# Supplementary material for: Effect of Obesity on the Expression of Nutrient Receptors and Satiety Hormones in the Human Colon
Source: MDPI journal article supplement (doi:10.3390/nu13041271), 2021-04-13
Supplement: s1 [file s1]

## Supplementary Data

**Supplementary Table 1:** Patient demographics from the Royal London Hospital, U.K.

|                                  | Female |       | Male |       |
|----------------------------------|--------|-------|------|-------|
| <b>N: (%)</b>                    | 10     | (33%) | 20   | (67%) |
| <b>Age: mean, +/- SD (years)</b> | 62.4   | ±19.2 | 61.5 | ±18.1 |
| <b>BMI: mean,+/- SD</b>          | 26.2   | ±4.1  | 25.7 | ±5.6  |

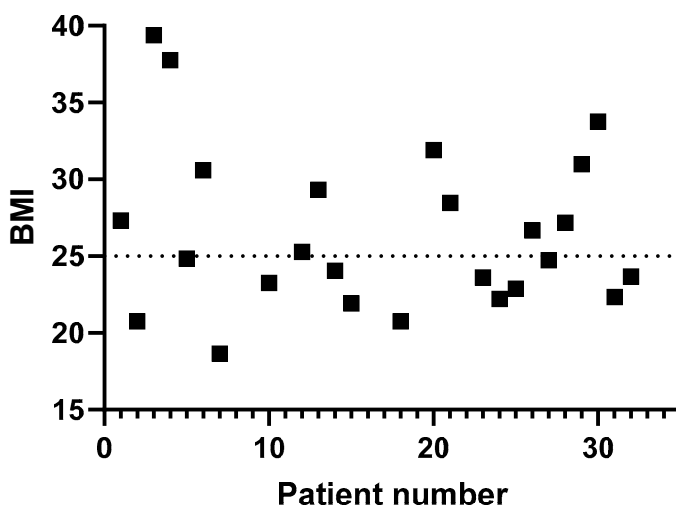

**Supplementary Graph 1:** Distribution of BMI for patient samples from the Royal London Hospital, UK. BMI data from individuals (N=32) from whom colonic tissue was collected is plotted alongside their assigned patient number.

**Supplementary Table 2:** Details of patient samples recruited at the University of Maastricht, Netherlands.

|                                  | Female |       | Male |       |
|----------------------------------|--------|-------|------|-------|
| <b>N: (%)</b>                    | 47     | 69.1% | 21   | 30.9% |
| <b>Age: mean, +/- SD (years)</b> | 44.8   | ±16.2 | 34.7 | ±8.9  |
| <b>BMI: mean,+/- SD</b>          | 25.8   | ±5.2  | 24.3 | ±5.2  |
| <b>IBS subtype: N, (%)</b>       |        |       |      |       |
| <b>Constipation</b>              | 18     | 38.3% | 0    | 0%    |
| <b>Diarrhoea</b>                 | 11     | 23.4% | 2    | 9.5%  |
| <b>Mixed</b>                     | 15     | 31.9% | 9    | 42.9% |
| <b>None (healthy control)</b>    | 3      | 6.4%  | 10   | 47.6% |

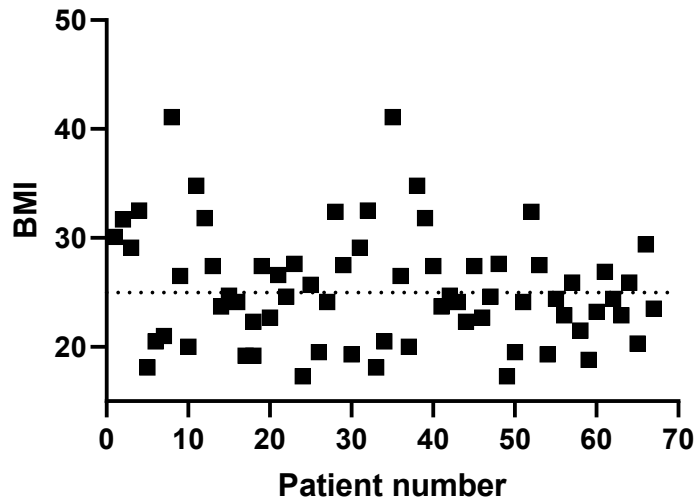

**Supplementary Graph 2: Distribution of BMI for patient samples from the University of Maastricht.** BMI data from individuals ( $N=67$ ) from whom colonic tissue was collected.

**Supplementary Table 3: Primary antibodies used for immunohistochemistry**

| Protein | Species | clonal | Company       | Product ID | Dilution |
|---------|---------|--------|---------------|------------|----------|
| CaSR    | Mouse   | mono   | Abcam         | AB-19347   | 1:200    |
| PYY     | Rabbit  | poly   | US Biological | P3285-10   | 1:200    |
| 5-HT    | Goat    | poly   | Immunostar    | 20079      | 1:200    |

**Supplementary Table 4: Secondary antibodies used for immunohistochemistry**

| Species | Species reactivity | Wavelength | Company    | Product ID | Dilution |
|---------|--------------------|------------|------------|------------|----------|
| Chicken | Mouse              | 488        | Invitrogen | A21200     | 1:400    |
| Donkey  | Rabbit             | 568        | Invitrogen | A10042     | 1:400    |
| Donkey  | Rabbit             | 488        | Invitrogen | A21206     | 1:400    |
| Donkey  | Goat               | 568        | Invitrogen | A11057     | 1:400    |
| Donkey  | Goat               | 488        | Invitrogen | A11055     | 1:400    |

**Supplementary Table 5: Primers for gene expression studies**

| Gene/ target               | Manufacturer | Product code |
|----------------------------|--------------|--------------|
| Cholecystokinin            | Qiagen       | QT00073871   |
| Cholecystokinin vb (CCK B) | Qiagen       | QT02405228   |
| Cholecystokinin va (CCK A) | Qiagen       | QT02405221   |
| Calcium-sensing receptor   | Qiagen       | QT00055944   |
| GPRC6a                     | Qiagen       | QT01033102   |
| IFN- $\gamma$              | Qiagen       | QT00000525   |
| 18s ribosomal RNA          | Qiagen       | QT00199367   |

**Supplementary Table 6.** Distribution of patient samples by gene examined by Taqman qPCR.

| <b>Proximal</b>  |                          | <b>Sigmoid</b>     |
|------------------|--------------------------|--------------------|
| A (n = 6, n = 6) | GPR43                    | F (n = 9, n = 11)  |
| B (n = 6, n = 6) | GPR41                    | G (n = 9, n = 8)   |
| C (n = 7, n = 6) | GPR109a                  | H (n = 9, n = 10)  |
| D (n = 6, n = 6) | GPR40                    | I (n = 9, n = 8)   |
| E (n = 7, n = 7) | GPR120                   | J (n = 12, n = 13) |
|                  | Calcium sensing receptor | K (n = 6, n = 7)   |
